# Supplementary material for: Non-volatile resistive switching mechanism in single-layer MoS2 memristors: insights from ab initio modelling of Au and MoS2 interfaces
Source: Royal Society of Chemistry journal article supplement (doi:10.1039/d3na00045a), 2023-01-01
Supplement: d3na00045a1.pdf [file d3na00045a1.pdf]

## Supporting Information

# Non-volatile resistive switching mechanism in single-layer MoS<sub>2</sub> memristors: Insights from ab initio modelling of Au and MoS<sub>2</sub> interfaces

Gabriele Boschetto,<sup>1</sup> Stefania Carapezzi<sup>1</sup>, and Aida Todri-Saniai<sup>1,2</sup>

<sup>1</sup>Laboratory of Computer Science, Robotics, and Microelectronics, University of Montpellier, CNRS, 161 Rue Ada, 34095 Montpellier, France

<sup>2</sup>Department of Electrical Engineering, Eindhoven University of Technology, Groene Loper 3, 5612 AE Eindhoven, Netherlands

E-mail: gabriele.boschetto@lirmm.fr; aida.todri@lirmm.fr

### 1. Stability of defects in free-standing MoS<sub>2</sub>

We assessed the effect of S vacancies, Au substitution, and different combinations of both on free-standing monolayer MoS<sub>2</sub> by computing formation energies of selected defects.

**Table S1.** Formation energies of selected defects in free-standing MoS<sub>2</sub>.

| Defect                         | E <sub>F</sub> [MoS <sub>2</sub> ] (eV) | E <sub>F</sub> [V <sub>S</sub> ] (eV) |
|--------------------------------|-----------------------------------------|---------------------------------------|
| V <sub>S</sub>                 | 2.75                                    | -                                     |
| V <sub>S2</sub> <sup>A</sup>   | 5.45                                    | 2.69                                  |
| V <sub>S2</sub> <sup>P</sup>   | 5.48                                    | 2.73                                  |
| Au <sub>S</sub>                | 3.48                                    | 0.72                                  |
| Au2 <sub>S2</sub> <sup>A</sup> | 7.27                                    | 4.52                                  |
| Au2 <sub>S2</sub> <sup>P</sup> | 6.64                                    | 3.88                                  |

The structural stability of defects can be assessed by computing their formation energies (see Table S1). To compute such a quantity, we considered two cases: i) a defect-free MoS<sub>2</sub>, and ii) a MoS<sub>2</sub> sample with a V<sub>S</sub> density of ~2%, in line with typical defect densities found in CVD-MoS<sub>2</sub>. Formation energies computed with the latter approach (E<sub>F</sub>[V<sub>S</sub>]) give us an estimate of how likely it is to generate new S vacancies (and Au to fill such vacancies) when the material is already defective, as it is the case in MoS<sub>2</sub> nanodevices. Formation energies computed with defect-free MoS<sub>2</sub> (E<sub>F</sub>[MoS<sub>2</sub>]) confirmed that V<sub>S</sub> is the most thermodynamically stable defect (E<sub>F</sub>[MoS<sub>2</sub>] = 2.75 eV), in accordance with previous studies. Additionally, it is worth noting that E<sub>F</sub>[MoS<sub>2</sub>] of an axial (V<sub>S2</sub><sup>A</sup>) and an in-plane S di-vacancy (V<sub>S2</sub><sup>P</sup>) is lower than the sum of E<sub>F</sub>[MoS<sub>2</sub>] for two infinitely separated S vacancies, which suggests the slight tendency of V<sub>S</sub> to form clusters. We also found that Au<sub>S</sub> has a higher E<sub>F</sub>[MoS<sub>2</sub>] (3.48 eV) than a simple S vacancy, which is the outcome of both the removal of an S atom and the addition of an Au atom from/to the defect-free MoS<sub>2</sub>. We could also observe the tendency of Au atoms to cluster in-plane rather than axially. When considering the material with a V<sub>S</sub> density of ~2%, we were able to confirm that additional S vacancies are slightly more likely to form in the proximity of

an already existing vacancy. Indeed,  $E_F[V_S]$  for one additional S vacancy is slightly lower than  $E_F[\text{MoS}_2]$  for the single S vacancy. Moreover, we found that the formation energy of  $\text{Au}_S$  significantly decreases ( $E_F[V_S] = 0.72 \text{ eV}$ ), making this the most energetically favourable defect. Once again, we found that Au atoms tend to form small clusters in-plane rather than axially out-of-plane.

## 2. Partial Charges of Selected Interfaces

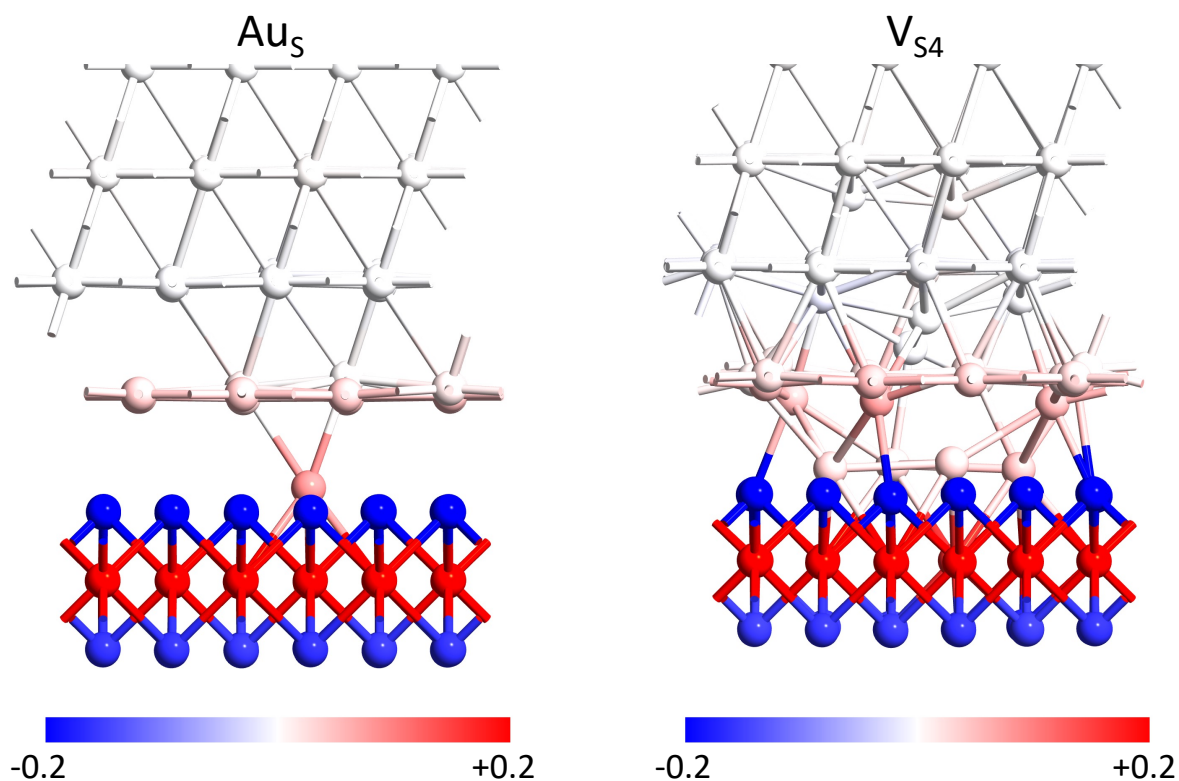

**Figure S1.** Mulliken population analysis of  $\text{Au}_S$  and  $V_{S4}$  interfaces. Negative partial charges are in blue, whereas positive partial charges are in red.
